# Supplementary material for: Improving Abiotic Stress Tolerance of Forage Grasses – Prospects of Using Genome Editing
Source: Preprints.org preprint supplement (doi:10.20944/preprints202212.0184.v1), 2022-12-12
Supplement: Supplementary file 1 [file Table S1_Forage grasses_Sustek-Sanchez et al 2022.xlsx]

## Sheet: TS1-Forage grasses list
Subfamily	Species	Common name	Biome	Life cycle
Pooideae	Agropyron cristatum	Crested wheatgrass	Temperate	Perennial
Pooideae	Agrostis capillaris	Common bentgrass	Temperate	Perennial
Pooideae	Agrostis stolonifera	Creeping bentgrass	Temperate	Perennial
Panicoideae	Andropogon gerardii ssp. hallii	Sand bluestem	Temperate	Perennial
Pooideae	Arrhenatherum elatius	Tall oatgrass	Temperate	Perennial
Panicoideae	Bothriochloa bladhii	Caucasian bluestem	Tropical & Subtropical	Perennial
Panicoideae	Bothriochloa pertusa	Pitted beardgrass	Tropical & Subtropical	Perennial
Pooideae	Bromus catharticus	Rescuegrass	Temperate	Annual
Pooideae	Bromus riparius	Meadow bromegrass	Temperate	Perennial
Pooideae	Bromus inermis	Smooth brome/Hungarian Brome	Temperate	Perennial
Panicoideae	Cenchrus americanus (Pennisetum glaucum)	Pearl millet	Tropical	Annual
Panicoideae	Cenchrus ciliaris	African foxtail grass/Buffel grass	Subtropical	Perennial
Chloridoideae	Chloris gayana	Rhodes grass	Tropical	Perennial
Chloridoideae	Cynodon dactylon	Bermuda grass	Subtropical	Perennial
Pooideae	Dactylis glomerata	Cocksfoot	Temperate	Perennial
Panicoideae	Echinochloa pyramidalis	Antelope grass	Tropical	Perennial
Pooideae	Elymus nutans	-	Temperate	Perennial
Panicoideae	Entolasia imbricata	Bungoma grass	Tropical	Perennial
Pooideae	Festuca rubra	Red fescue	Temperate	Perennial
Panicoideae	Heteropogon contortus	Spear grass	Temperate & Tropical	Perennial
Panicoideae	Hymenachne amplexicaulis	West Indian marsh grass	Tropical & Subtropical	Perennial
Panicoideae	Hyparrhenia rufa	Jaragua grass	Tropical	Perennial
Oryzoideae	Leersia hexandra	Southern cutgrass	Tropical & Subtropical	Perennial
Pooideae	Lolium multiflorum	Italian ryegrass	Temperate	Annual
Pooideae	Lolium perenne	Perennial ryegrass	Temperate	Perennial
Panicoideae	Megathyrsus maximus	Guinea grass	Tropical	Perennial
Panicoideae	Melinis minutiflura	Molasses grass	Tropical	Perennial
Panicoideae	Panicum virgatum	Switchgrass	Temperate	Perennial
Panicoideae	Paspalum conjugatum	Buffalo grass	Tropical & Subtropical	Perennial
Panicoideae	Paspalum dilatatum	Dallisgrass	Tropical	Perennial
Panicoideae	Paspalum notatum	Bahia grass	Tropical	Perennial
Pooideae	Phalaris arundinacea	Reed canary grass	Temperate	Perennial
Pooideae	Phleum pratense	Timothy	Temperate	Perennial
Pooideae	Poa arachnifera	Texas bluegrass	Temperate	Perennial
Pooideae	Poa nemoralis (Agrostis alba)	Forest blue grass/Wood Meadow Grass	Temperate	Perennial
Pooideae	Poa pratensis	Smooth meadowgrass	Temperate	Perennial
Pooideae	Poa trivialis	Rough meadowgrass	Temperate	Perennial
Pooideae	Psathyrostachys juncea	Russian wildrye	Temperate	Perennial
Pooideae	Lolium arundinaceum (Festuca arundinacea)	Tall fescue	Temperate	Perennial
Pooideae	Lolium pratense (Festuca pratensis)	Meadow fescue	Temperate	Perennial
Panicoideae	Setaria italica	Foxtail millet	Temperate	Annual
Panicoideae	Setaria sphacelata	Golden bristle grass	Tropical	Perennial
Panicoideae	Setaria viridis	Green foxtail	Temperate	Annual
Panicoideae	Themeda triandra	Kangaroo grass	Tropical	Perennial
Pooideae	Thinopyrum intermedium	Intermediate wheatgrass	Temperate	Perennial
Panicoideae	Urochloa decumbens (Brachiaria decumbens)	Signal grass	Tropical	Perennial
Panicoideae	Urochloa humidicola (Brachiaria humidicola)	Koronivia grass	Tropical	Perennial
